# Supplementary material for: Geographical differences in preterm delivery rates in Sweden: A population‐based cohort study
Source: PubMed Central journal article supplement (PMC6492021; doi:10.1111/aogs.13455), 2018-10-08

- Oxelösund 1
- Hammarö 2
- Håbo 3
- Munkfors 4
- Hallstahammar 5
- Kurma 6
- Sölvesborg 7
- Kungälv 8
- Vadstena 9
- Trosa 10
- Ålvkarleby 11
- Mullsjö 12
- Fagersta 13
- Knivsta 14
- Håbo 15
- Arboga 16
- Surahammar 17
- Kil 18
- Tranås 19
- Forshaga 20
- Vingåker 21
- Hofors 22
- Olofström 23
- Degerfors 24
- Gnosjö 25
- Lessebo 26
- Ödeshög 27
- Norberg 28
- Torsås 29
- Storfors 30
- Grums 31
- Lekeberg 32
- Karlshamn 33
- Karlskoga 34
- Markaryd 35
- Gnesta 36
- Vännäs 37
- Mjölby 38
- Aneby 39
- Mönsterås 40
- Boxholm 41
- Kungsbacka 42
- Borlänge 43
- Hallsberg 44
- Säter 45
- Borgholm 46
- Åvesta 47
- Ljusnarsberg 48
- Mörbylånga 49
- Köping 50
- Söderköping 51
- Emmaboda 52
- Nora 53
- Strängnäs 54
- Åtvidaberg 55
- Valdemarsvik 56
- Laxå 57
- Skinnskatteberg 58
- Sävsjö 59
- Kristinehamn 60
- Högsby 61
- Ydre 62
- Gagnef 63
- Flen 64
- Timrå 65
- Askersund 66
- Ronneby 67
- Eksjö 68
- Vaggeryd 69
- Eda 70
- Varberg 71
- Haparanda 72
- Laholm 73
- Västerås 74
- Kalmar 75
- Hedemora 76
- Nässjö 77
- Smedjebacken 78
- Ålmhult 79
- Karlskrona 80
- Halmstad 81
- Hylte 82
- Eskilstuna 83
- Oskarshamn 84
- Alvesta 85
- Motala 86
- Hällefors 87
- Ockelbo 88
- Enköping 89
- Katrineholm 90
- Härnösand 91
- Söderhamn 92
- Falkenberg 93
- Gislaved 94
- Vimmerby 95
- Sala 96
- Tingsryd 97

- Säffle 98
- Nybro 99
- Uppvidinge 100
- Hultsfred 101
- Heby 102
- Finspång 103
- Nordmaling 104
- Karlstad 106
- Värnamo 107
- Leksand 108
- Robertsfors 109
- Kinda 110
- Bjurholm 111
- Lindesberg 112
- Sunne 113
- Örebro 114
- Nordanstig 115
- Jönköping 116
- Tierp 117
- Vinsåker 118
- Östhammar 119
- Vetlanda 119
- Nyköping 120
- Linköping 121
- Norrköping 122
- Ludvika 123
- Vansbro 124
- Årjäng 125
- Gävle 126
- Ålvsbyn 127
- Filipstad 128
- Orsa 129
- Malå 130
- Kalix 131
- Växjö 132
- Kramfors 133
- Norsjö 134
- Arvika 135
- Bollnäs 136
- Hagfors 137
- Luleå 138
- Ovanåker 139
- Västervik 140
- Ljungby 141
- Rättvik 142
- Uppsala 143
- Falun 144
- Östersund 145
- Umeå 146
- Övertorneå 147
- Ragunda 148
- Hudiksvall 149
- Dorotea 150
- Vindeln 151
- Överkalix 152
- Mora 153
- Gottland 154
- Piteå 155
- Ånge 156
- Sundsvall 157
- Bräcke 158
- Boden 159
- Malung 160
- Torsby 161
- Åsele 162

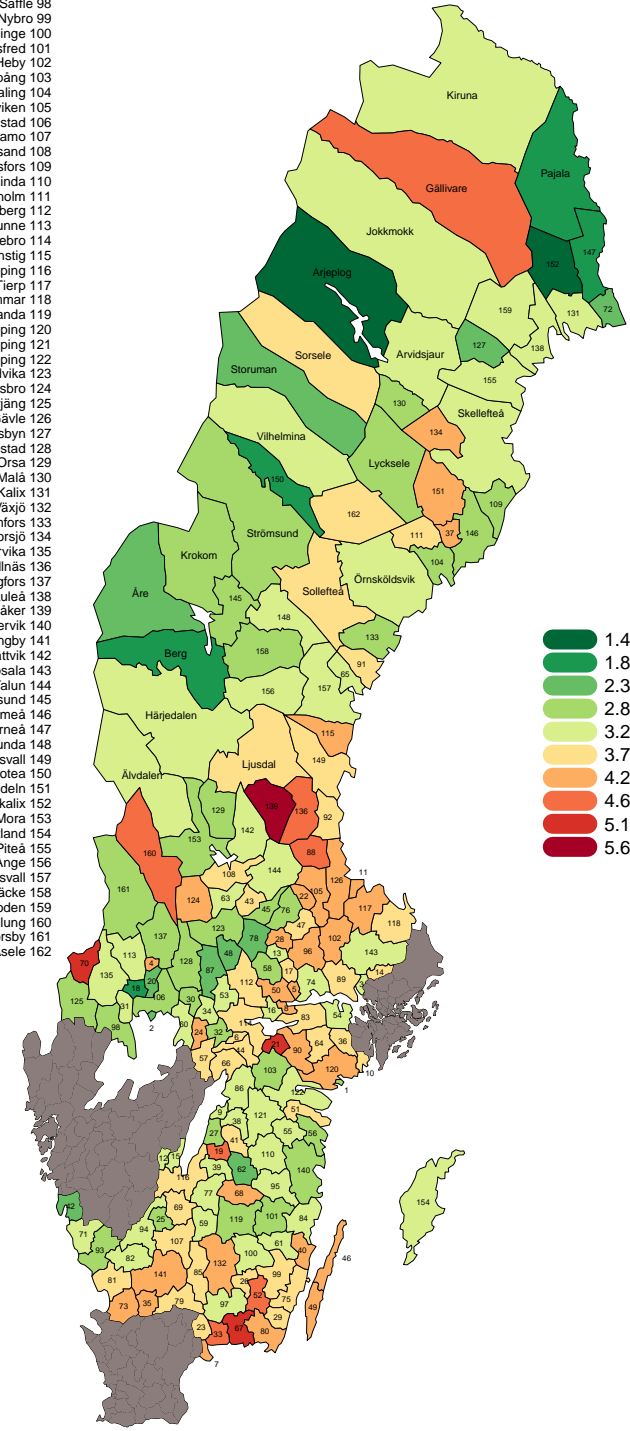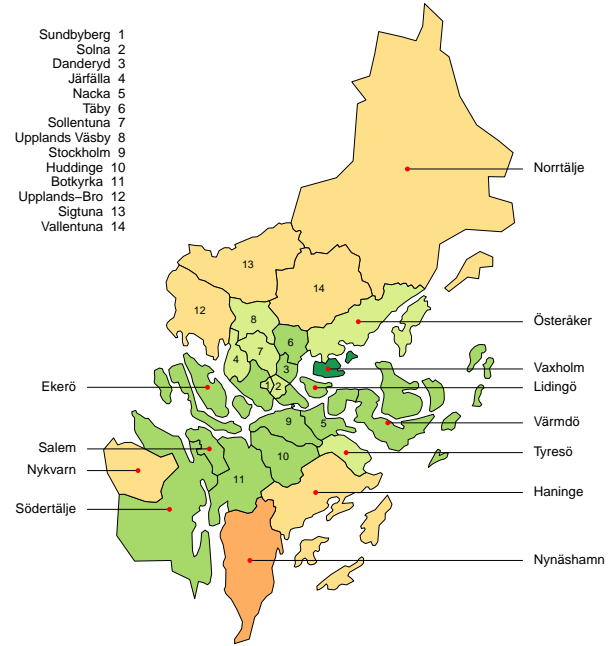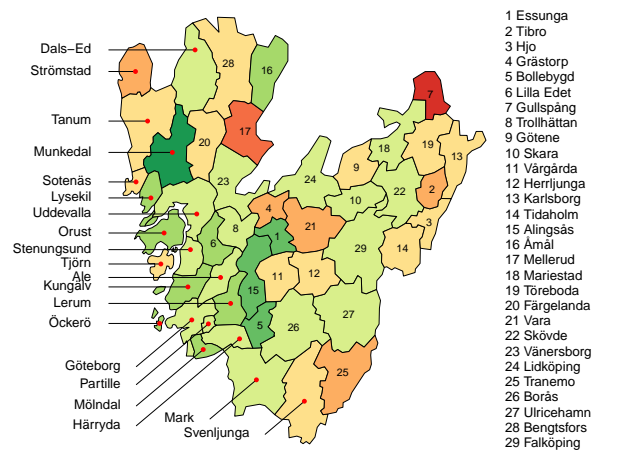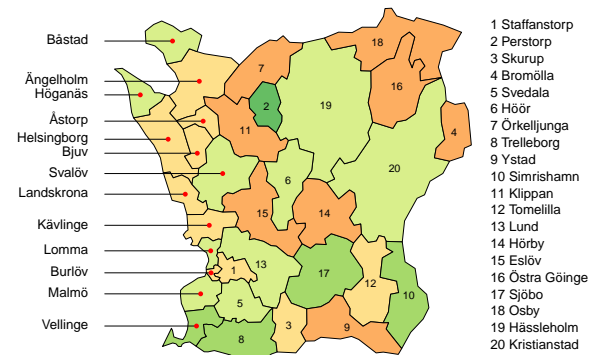

Supplement: AOGS-98-106-s004.pdf [file AOGS-98-106-s004.pdf]
