# Supplementary material for: Geographical differences in preterm delivery rates in Sweden: A population‐based cohort study
Source: PubMed Central journal article supplement (PMC6492021; doi:10.1111/aogs.13455), 2018-10-08

estimate and CI

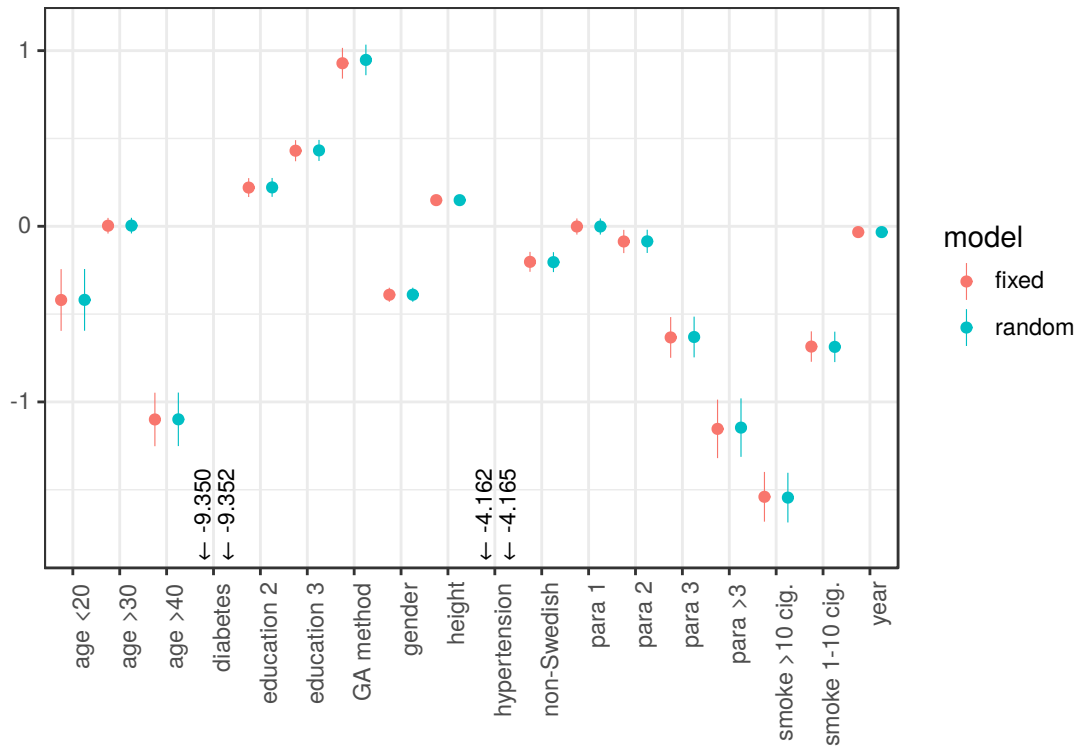

Supplement: AOGS-98-106-s008.pdf [file AOGS-98-106-s008.pdf]
